# Supplementary material for: Second-generation proteasome inhibitor carfilzomib enhances doxorubicin-induced cytotoxicity and apoptosis in breast cancer cells
Source: PubMed Central journal article supplement (PMC5342008; doi:10.18632/oncotarget.12048), 2016-09-15
Supplement: oncotarget-07-73697-s001.pdf [file oncotarget-07-73697-s001.pdf]

## Second-generation proteasome inhibitor carfilzomib enhances doxorubicin-induced cytotoxicity and apoptosis in breast cancer cells

### SUPPLEMENTARY FIGURES

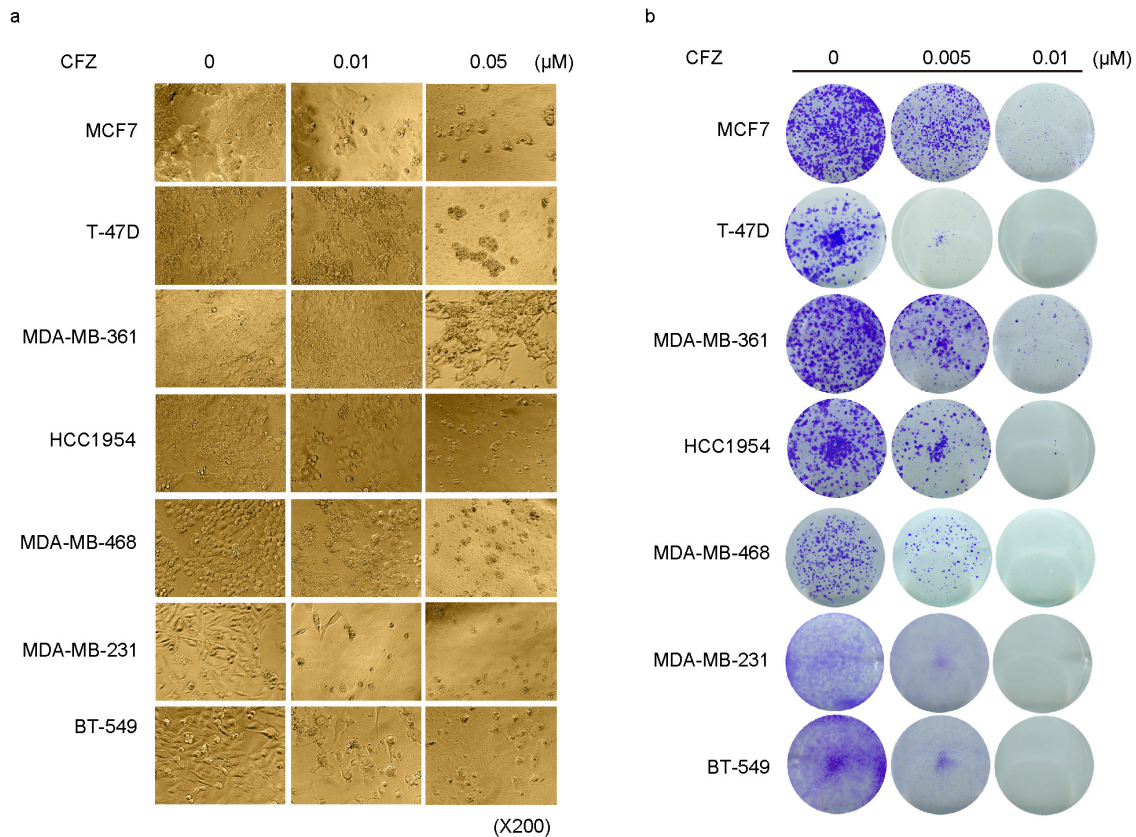

**Supplementary Figure S1: Carfilzomib shows cytotoxic effects on breast cancer cells. a.** Photographs of cytotoxic effects of carfilzomib on breast cancer cells. Seven human breast cancer cell lines, MCF7, T-47D, MDA-MB-361, HCC1954, MDA-MB-468, MDA-MB-231, and BT-549 were treated with carfilzomib at 0, 0.001 μM, 0.01 μM, 0.05 μM, 0.1 μM, 1 μM, 10 μM, or 50 μM for 72 h, then photographed. Since the IC<sub>50</sub>s were around the doses of 0.01 μM and 0.05 μM within all cell lines, we only showed the data for these two doses. **b.** Effects of carfilzomib on colony formation of breast cancer cells. Seven breast cancer cell lines were seeded in 12-well plates at  $2 \times 10^3$  per well, then incubated with carfilzomib at 0, 0.005 μM, or 0.01 μM for 72 h and cultured in drug-free medium for about two weeks. The cell colonies were fixed, stained with crystal violet, and photographed.

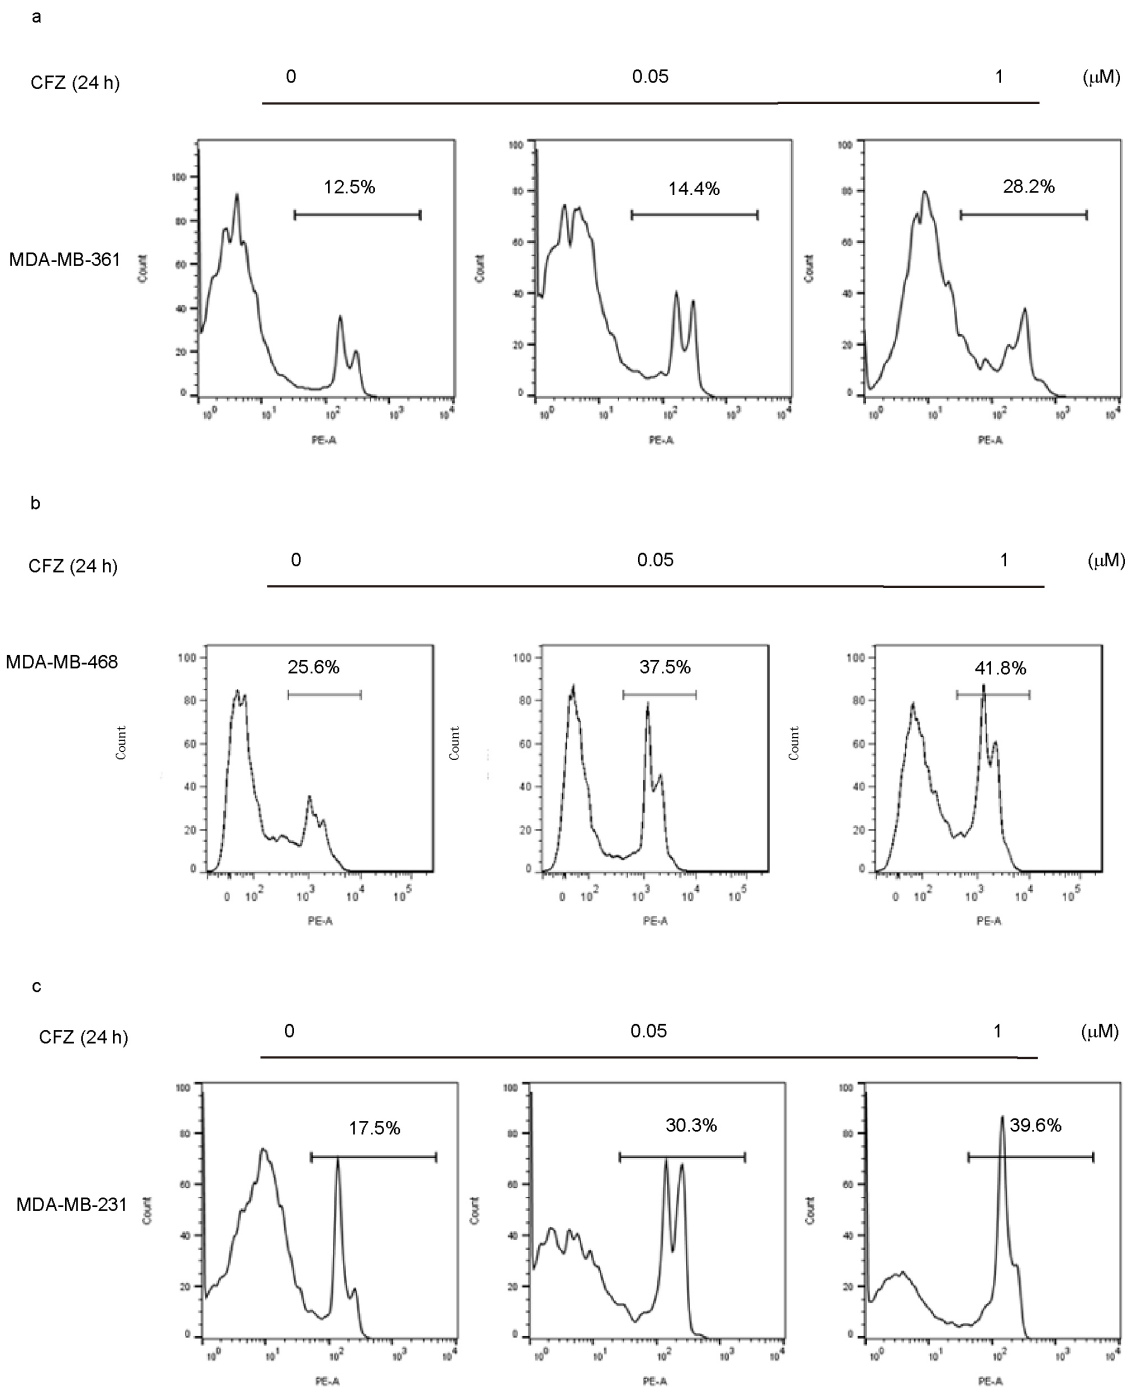

**Supplementary Figure S2: Carfilzomib shows cytotoxic effects on breast cancer cells.** Flow cytometry of MDA-MB-361, MDA-MB-468 and MDA-MB-231 cells treated with carfilzomib was shown. The cells were incubated in 6-cm dishes at  $1 \times 10^6$  per dish with carfilzomib at 0, 0.05  $\mu\text{M}$ , or 1  $\mu\text{M}$  for 24 h, then analyzed by flow cytometry for the percentage of apoptotic cells by incubating with PI for 15 min at RT.

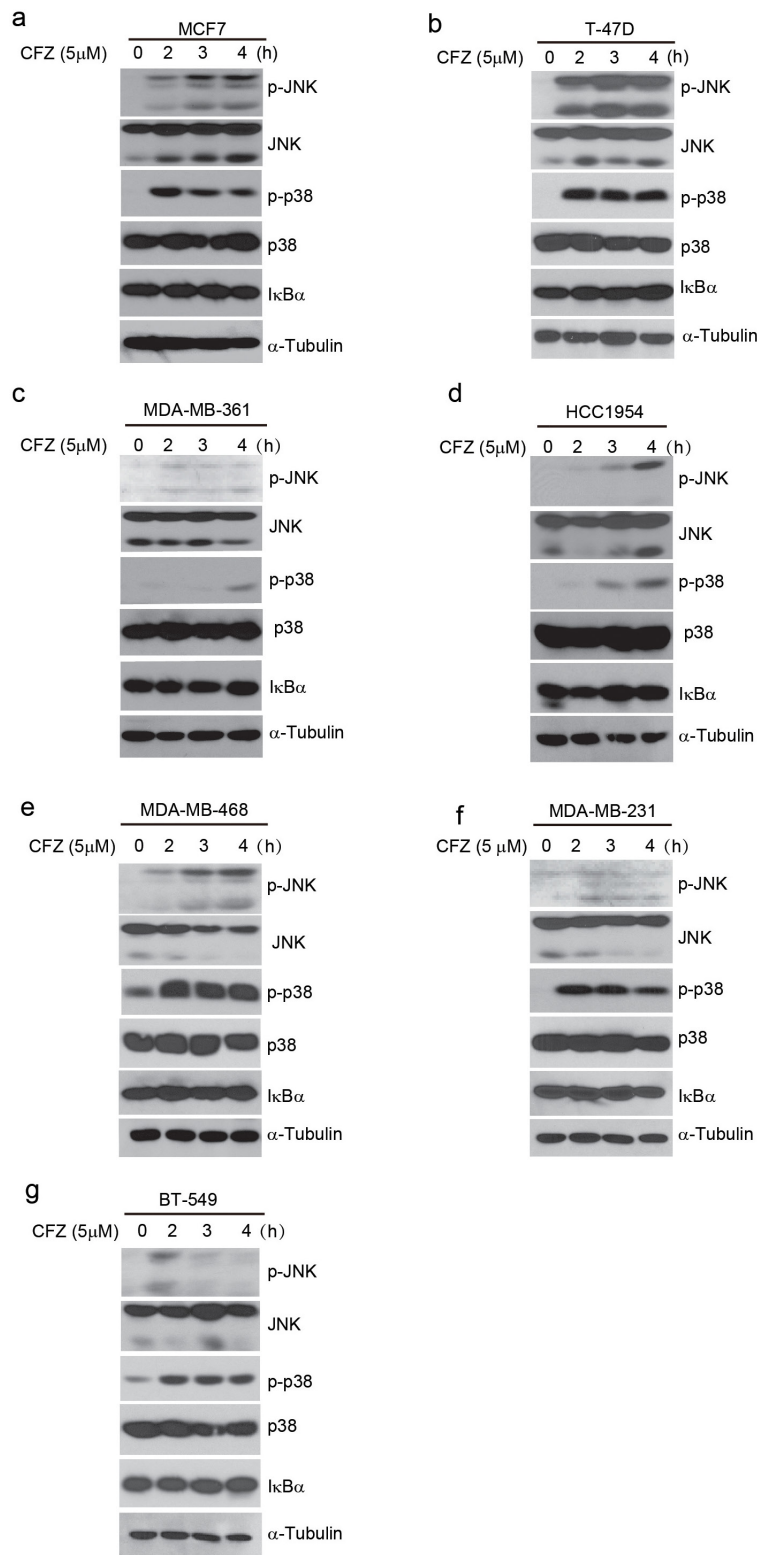

**Supplementary Figure S3: Carfilzomib induces SAPK/JNK and p38 MAPK phosphorylation in the tested cell lines.** **a-g.** Breast cancer cell lines MCF7, T-47D, MDA-MB-361, HCC1954, MDA-MB-468, MDA-MB-231, and BT-549 were treated with carfilzomib (5  $\mu$ M) alone for 0, 2 h, 3 h or 4 h. Then whole cell lysates were subjected to SDS-PAGE and immunoblotted with antibodies against p-SARP/JNK, SARP/JNK, p-p38 MAPK, p38 MAPK, and I $\kappa$ B $\alpha$ .  $\alpha$ -Tubulin was used as the loading control.
